# Supplementary material for: Chromosomal Inversions between Human and Chimpanzee Lineages Caused by Retrotransposons
Source: PLoS One. 2008 Dec 29;3(12):e4047. doi: 10.1371/journal.pone.0004047 (PMC2603318; doi:10.1371/journal.pone.0004047)
Supplement: Table S1 — Genomic positions of RRMI loci between human and chimpanzee lineages (0.03 MB XLS) [file pone.0004047.s001.xls]

## Sheet: Sheet1
Table S1. Genomic positions of RRMI loci between human and chimpanzee lineages
Locus name	Inversion status	Human position (hg18)	Chimpanzee position (panTro2)
P1	Chimp-specific inversion	Chr1:50911546-50912216	Chr1:51492318-51492985
P2	Chimp-specific inversion	chr11:123,763,520-123,766,273	chr11:123,361,589-123,364,337
P3	Human-specific inversion	Chr12:17818591-17899779	Chr12:18253741-18335835
P4	Human-specific inversion	chr12:79,372,432-79,379,861	chr12:81,091,058-81,098,484
P5	Human-specific inversion	chr12:85,765,732-85,775,687	chr12:87,691,971-87,703,145
P6	Human-specific inversion	Chr14:94557549-94558300	Chr14:95278134-95279022
P7	Human-specific inversion	Chr16:83746458-83747099	Chr16:85430349-85430989
P9	Chimp-specific inversion	Chr19:1850656-1851409	Chr19:1877350-1878107
P11	Human-specific inversion	Chr19:4581812-4582623	Chr19:4701686-4702297
P14	Human-specific inversion	chr2:181342295-181355380	chr2b:185854770-185868045
P15	Chimp-specific inversion	Chr20:29430667-29432995	Chr20:28301089-28303413
P16	Human-specific inversion	Chr21:40322640-40326958	Chr21:39746605-39750987
P17	Human-specific inversion	Chr21:44712866-44713215	Chr21:44113596-44113941
P18	Human-specific inversion	Chr22:16138680-16139342	chr22:16,155,417-16,159,752
P19	Chimp-specific inversion	Chr22:16153354-16153628	Chr22:16174416-16174690
P20	Chimp-specific inversion	Chr3:33765548-33765713	Chr3:34548514-34548679
P21	Human-specific inversion	Chr3:50902427-50909063	Chr3:52095634-52102134
P22	Chimp-specific inversion	chr3:167,824,064-167,827,223	chr3:171,773,291-171,776,441
P23	Chimp-specific inversion	Chr4:42825308-42826106	Chr4:43544184-43544982
P25	Human-specific inversion	Chr4:187239040-187239295	Chr4:190787193-190787448
P29	Human-specific inversion	chr8:48,378,725-48,392,102	chr8:45,257,360-45,271,505
P31	Human-specific inversion	chrX:46,695,945-46,715,452	chrX:47,282,001-47,301,853
P33	Human-specific inversion	ChrX:55081223-55090092	ChrX:55464563-55473440
P34	Human-specific inversion	chr12:12,436,268-12,437,719	chr12:12,793,349-12,795,096
P35	Human-specific inversion	chr2:234,136,145-234,151,242	chr2b:239,796,789-239,810,666
P37	Human-specific inversion	Chr1:154536755-154536924	Chr1:135507147-135507315
P38	Human-specific inversion	Chr11:91566848-91568662	Chr11:90689012-90690826
P40	Human-specific inversion	chr15:88643588-88644254	chr15:88,052,017-88,052,753
P41	Chimp-specific inversion	Chr16:27123868-27125094	Chr16:27624100-27624999
P43	Chimp-specific inversion	chr7:76,950,495-76,951,279	chr7:76,835,031-76,835,801
P45	Human-specific inversion	Chr9:87384991-87385172	Chr9:84581590-84581771
P46	Chimp-specific inversion	chrX:44,309,704-44,312,019	chrX:44,869,442-44,870,410
P47	Chimp-specific inversion	chrX:100,042,006-100,042,164	chrX:100,461,671-100,462,125
P48	Chimp-specific inversion	chr1:105,164,367-105,176,949	chr1:106,508,878-106,521,024
P49	Chimp-specific inversion	chr10:69326545-69327049	chr10:66893921-66894485
P50	Human-specific inversion	chr14:35,451,695-35,461,393	chr14:35,019,123-35,029,445
P52	Chimp-specific inversion	chr2:242,154,761-242,155,774	chr2b:247,974,259-247,975,224
P53	Chimp-specific inversion	chr20:8,780,747-8,781,900	chr20:8,817,707-8,818,953
P58	Chimp-specific inversion	chr12:19,430,520-19,430,837	chr12:19,920,456-19,920,664
P61	Human-specific inversion	chr12:68,040,846-68,040,972	chr12:69,684,345-69,684,803
P62	Chimp-specific inversion	chr14:75,802,889-75,803,173	chr14:76,025,207-76,025,278
P63	Chimp-specific inversion	chr19:11,715,479-11,717,103	chr19:12,059,409-12,060,973
P65	Chimp-specific inversion	chr3:160,598,836-160,602,389	chr3:164,456,879-164,460,593
P67	Human-specific inversion	chr7:65,251,901-65,252,246	chr7:65,767,891-65,768,297
P68	Human-specific inversion	chr8:75,000,285-75,000,373	chr8:72,370,515-72,372,189
P69	Chimp-specific inversion	chr8:83,718,973-83,726,003	chr8:81,284,720-81,285,067
P70	Chimp-specific inversion	chr9:36,214,050-36,214,156	chr9:36,973,579-36,974,296
P71	Human-specific inversion	chrX:149,321,798-149,335,728	chrX:149,965,521-149,979,513
P73	Human-specific inversion	chr2:35,364,334-35,365,819	chr2a:36,047,112-36,048,866
