# Supplementary material for: Chromosomal Inversions between Human and Chimpanzee Lineages Caused by Retrotransposons
Source: PLoS One. 2008 Dec 29;3(12):e4047. doi: 10.1371/journal.pone.0004047 (PMC2603318; doi:10.1371/journal.pone.0004047)
Supplement: Table S2 — Primer information for RRMI loci (0.03 MB XLS) [file pone.0004047.s002.xls]

## Sheet: Sheet1
Table S2. Primer information for RRMI loci
Name	Forward primer	Reverse primer	A.T. (˚C)	Product size (bp)
P1H	GCAGAAGCAGAATTCAAAAGG	TCCAGTTTCAGTTTTTAGGGATG	60	394
P1C	CACAACGGAATGGATGCTC	TCCAGTTTCAGTTTTTAGGGATG	60	494
P2H	TCTATGCAGTTGAATCCTATGTACC	GGTGTGCTCCTAGGCATTGT	55	2987
P2C	ACTGGAGGACTCTGGTTAAAGATG	TCTGAGACCTTCATCACTGACTCT	60	2759
P3H	TCCGTAAATGGACTGCCTGT	AGATGAACCCGGTACCTCAG	60	221
P3C	GCAAAGCAACAAGTCGTGAA	TTGACAAGTAAGCACCCAAGA	60	6689
P6H	GCCATGCTCAATTTTCTGAC	CACATTTTGGGCACATACAA	60	700
P6C	TGAACCTTCTCAATGCCTCTG	CACATTTTGGGCAGACACAA	60	459
P7H	CACCTGGATGCCCACTTATT	TCAGAAACCCCACATGTTCA	60	363
P7C	CACCTGGATGCCCACTTATT	CTGCAGGTAAGGGACAGAGC	60	373
P9H	CTCAGCCATGTGGAAACAGA	GGCCTGGCTAAGAAACAATG	60	481
P9C	GGCCTGGCTAAGAAACAATG	CTGAGAGGCCTTCTCTAACCA	60	468
P11H	ACTGCGCCCGGCTAATTT	CAGCCATGAGGAACCAAGTC	60	379
P11C	GCTGATTTTCCTTTCACCTTTG	CCATGAGGAACCGAGTCAAT	60	561
P14H	TGCTGACCAGATAGTCACAAAGA	GCCTGGACATGACTAAATCTCAG	60	4840
R14C	CAGATGTGCAAATAGAGAAGTCA	CCTTTCTGGTGTTGGGAGAA	60	6580
P15H	ACCTGGCAGATGAAAAGTGG	GCCCACTCAACCTCCATTAT	60	363
P15C	ACCTGGCAGATGAAAAGTGG	GTGGATGGATCTCAAGAGCA	60	489
P17H	GCATTTGTGCTGGTATTTCA	GATTCTCTTGTGACTCATGTCATTT	60	250
P17C	GCATTTGTGCTGGTATTTCA	GGAAGATACCTGTCCAGTGTGA	60	395
P18H	AAATACCTTTTGTGGCCAGGT	CTTTCTCCCTAAGCCCCCTA	60	314
P18C	GCCCTGGGAATGGGATATAA	GATGTCCTCAGGGAGGATGA	60	3873
P19H	TCCTCCTATTGAGGGACTGG	AGCTGCTGTGATGTCATGTATT	60	400
P19C	GCGGGTGATGTGATCTTACC	AGCTGCTGTGATGTCATGTATT	60	462
P20H	CTGTGACAACTCATCAGGAGCTA	TATGGACGGTGAGGGGACT	60	398
P20C	TCTGTGACAACTCATTAGGAGCTA	TGAGGACAGCTGTTAACTACGTTT	60	400
P23H	TGTTGCCTTATACAGTTGCCTTT	GCCATAAAATAATTGCACTAAAACC	60	585
P23C	AATGGTGGTTGTGAGGGACT	GCCATAAAATAATTGCACTAAAACC	60	285
P25H	GCTTTGGAATGCTTCTTAATTG	AACCGCCAGAGGAGTAAAGG	60	245
P25C	CCTACTGTCCCCCAAGTGAC	AACCGCCAGAGGAGTAAAGG	60	392
P33H	AGGCAGAGAAAGCAATATGAGC	GAGGATGTGGATGGAATTTGTT	55	2821
P33C	TCATCCTGGTACTTGGTTCTTC	TGCTAGTTGCTTCCTATGTGTC	55	2512
P34H	AGCAAAGGACCCTATACATGC	TGCACCATTTTAGCTTTGTCTC	60	850
P34C	TTGGACTTAGAGCTGCACCA	CACACCTGATCTGTACCAAATTGT	60	456
P37H	GACCAGAACCCGAATAACGA	TGGTACCTTTTGGATTTTGTACC	60	276
P37C	GGTGATATCTGGTGGGATGC	AGCCCTTTGGTACCTTTTGG	60	398
P38H	AAGGCAACAAGTATGCAAGACA	AGGATTGCAATTCACCAAGG	60	544
P38C	AGGATTGCAATTCACCAAGG	AGGACTACACCAGGCAAGCA	60	583
P40H	GCGATCTTCATCTCATCTTCAC	GGGGTCTTGTCTTGCTACTCTA	60	880
P40C	GATGAGATGAAGATCACGGTCA	GGGGTCTTGTCTTGCTACTCTA	60	512
P41H	TCAGGGAGGTGCTTTAGAGG	ATCCCTCTTGGAAGCCACTG	60	393
P41C	TATCCCTCTTGGAAGCCACT	TTCCCAGAACTCCTCACTGAA	60	394
P43H	GCATTTCAGAACTGTTAGCATGA	CATTCCCCAGCAAAACAACT	60	2216
P43C	TGGTTGCTTTTCTCGGAATC	GGGGCTAATATTGCCTCCTT	60	1830
P45H	TTTTTGGAGTTTTGAGGCTTAG	TTCTGCTTACTTTTGTTCAGGTCA	60	150
P45C	TCTAAGCCTCAAAACTCCAAAA	GCTTACTTTTGTTCAGGCCATA	60	253
P48H	TGTTGCAGAATACATGGAGGA	GCTGGGGAGTCTTCTTATGG	60	6016
P48C	TGAGAAGACCCAATGTTCATGT	TGGAAGTGGGTATCCTTGTTG	60	6828
P49H	GGGGCCATTTCTGAACTGTA	TTCTGAGAACCATGACCACAA	60	598
P49C	GGTGTGTTAAGGAAGTTATTGCTC	CACTCTTCTCCAAGTGATTCTCA	60	596
P50H	TTGCATATGGCAACTTTGTG	TCAGACTGGTTGCTGATTGC	60	292
P50C	GCCCATTTTCTTTCCCTTTT	TGTGCCACAAGCACTGTGTA	55	1458
P52H	AGTGTTGTGAGCCGTGTGAG	CCACTGTGTCCTTCCAGCTC	60	1356
P52C	CCACTGTGTCCTTCCAGCTC	TGTAAACCTTGGTGGGAAGC	60	1745
P53H	CACCTGGAAAGTGGAAGCAT	GGCTCCTCTTGCCCTCTAGT	60	972
P53C	GGCTGCAAAATAACCCTGAG	CAAAGGAACTTTGGGCACAT	60	950
P61H	GAGTTCATGGTGTTCACAAAGC	CACTGGCTCCTGATAAAAACAA	60	393
P61C	GAGTTCATGGTGTTCACAAAGC	GGGTCCTGCCTCAAAAATTAAC	60	498
P65H	TGAGCTTGCATTTAGTGGTGAG	TATTTGTGGGAGGCTCTCAAGT	60	1829
P65C	CTTATTTCATTCACGCAAGCAG	TGCATTTAGTGGTGAGAGGATG	60	1699
P67H	TCCTGTGTTGGAAAGAAAAGGT	CCTCCTTTCCCTGCTTTATTCT	60	288
P67C	TCCTGTGTTGGAAAGAAAAGGT	TAGCACGTCTTGGATCACTAGG	60	377
P69H	TTGTTGTTCCGATGTGGTTTTA	CTCTTGCAGATCCAGTTTCTGA	60	792
P69C	TAAAACCACATCGGAACAACAA	GCAAAGCTGTGAGGAATGAAAT	60	195
P73H	TCCCATAAGTCCTGCTCCTTTA	CCCACTGATTGATTATGGATTT	60	521
P73C	TCCCATAAGTCCTGCTCCTTTA	CAGTGATTGCCCATTCAATCTA	60	365
